# Supplementary material
Source: Research Square preprint supplement (doi:10.21203/rs.3.rs-9202691/v1)
Supplement: Supplementary file 1 [file 4a0fd2c798bbee987c7335f4.docx]

**Incentives and constraints in the conversion from conventional to organic viticulture farming in the Neusiedler See DAC region, Burgenland, Austria**

Organic Agriculture
Journal of The International Society of Organic Agriculture Research

Tina Achs, Sonja Kaufmann, Christoph Schunko, Christian Reinhard Vogl

Christian Reinhard Vogl
BOKU University
Institute of Organic Farming
Department of Agricultural Science
Gregor-Mendel-Straße 33, 1180 Vienna, Austria
E-Mail: christian.vogl@boku.ac.at

# Annex 1: Overview of DAC quality labels

Today, six of 18 DAC (*Districutus Asutriae Controlatus*) regions are located in Burgenland, covering an area of 11.537,88 ha (Österreich Wein Marketing GmbH 2025; Weiß 2025, personal communication).

The European Wine Law establishes three quality levels for wine (Council of the European Union 2013; RIS 2023):

- Wines with a protected designation of origin (PDO): Wine (in Austria: *Qualitätswein*)that is fully processed in specific regions, where the grapes for “Qualitätswein” originate from this specific region.
- Wines with a protected geographical indication (PGI): Wine is made exclusively from grapes harvested in a specific wine – growing region: the vinification is subject to regulation, but less stringent regarding vinification than quality wine (in Austria: *Landwein*). The origin of the grapes for “Landwein” are three wine-growing regions in Austria (Weinland, Steirerland, Bergland) - 100% of the grapes used for Landwein must originate from one of these three regions.
- Wines without a geographical indication (in Austria: *Tafelwein*): No further designation of origin is permitted. Austrian wine (made from Austrian grapes) or wine from several countries of the European Union (made from grapes from several countries of the EU).

Generic wines and specific wines with or without DAC (*Districtus Austriae Controlatus*) status can be marketed as quality wines in Austria. Generic and specific quality wines are equivalent in terms of quality. The difference lies in the origin. Quality wines from generic regions bear the name of the federal state (e.g. Burgenland, Lower Austria), whereas specific regions (e.g. Wachau, Südsteiermark) are located within the generic regions. Quality wine from specific regions are DAC wines. The specific regions have laid down in their own regulations the conditions under which wine with their designation of origin may be marketed. These regulations concern, for example, restrictions on grape varieties, the earliest date for submitting the test number and the permitted indication of narrower origins. If a quality wine from a specific region does not comply with the DAC regulations, it may only be marketed under the designation of origin of the generic region (Weiß 2024, personal communication). In order for a region to apply for a DAC – status for a quality wine in a specific region, the regional wine committee (*in Burgenland: Regionales Weinkomitee Burgenlnad*) must define the typicity of the region. Once a consensus has been reached, a draft regulation is drawn up in collaboration with experts from the Ministry of Agriculture, the Chamber of Agriculture, the Chamber of Commerce and the Austrian Wine Marketing Association and submitted to the National Wine Committee. The National Wine Committee submits the final application to the Ministry of Agriculture. If the application is elevated to the status of a law, its typical wine of origin is labeled with the name of the region and the addition DAC (i.e. *Wachau DAC*) (Österreich Wein Marketing GmbH 2024; RIS 2023). Generic and specific wines with or without DAC meet the EU requirements for wines with a PDO (RIS, 2023). In Austria, DAC wine production is divided into 18 DAC regions, where factors such as adherence to processing techniques prescribed by the regional wine committee are controlled (Österreich Wein Marketing GmbH 2024; RIS 2023; Karlik et al. 2018). In the year 2025, almost all of Burgenland´s territory lies within one of the six DAC regions: Neusiedlersee DAC lies within Neusiedlersee wine-growing region (5959,39 ha), Leithaberg DAC and Ruster Ausbruch DAC lies within Leithaberg wine-growing region (2955,23 ha), Mittelburgenland DAC lies within Mittelburgenland wine-growing region (2026,06 ha), Eisenberg DAC lies within Eisenberg wine-growing region (525,16 ha) and Rosalia DAC lies within Rosalia wine-growing region (227,64 ha) (RIS 2023; Tomšík and Prokeš 2011; Karlik et al. 2018; Statistik Austria 2024; Österreich Wein Marketing GmbH 2025; Weiß, 2025, personal communication).

# Annex 2: Criteria for obtaining the “Nachhaltig Austria” seal for Austrian conventional viticulture farmers

Austrian conventional viticulture farmers have the opportunity to achieve a label called “Nachhaltig Austria” based upon a conventional private certification scheme after an external audit. To achieve the certificate, the entire production process from the vineyard management to bottling is analyzed for its contribution to sustainability in terms of ecological, economic and social aspects (Österreichischer Weinbauverband, 2019).

Evaluation categories include:

*In ecology aspects*

- Production of grapes
- Production of wine
- Planting and maintenance of vineyards

*In economy aspects*

- Sustainable business management incorporating analyses, key figures, and inter-company machine utilization
- Promotion of regional products
- Contribution to economic sustainability

*In social aspects*

- Protection of employees
- Fair remuneration
- Training and continuing education for employees (Österreichischer Weinbauverband 2019).

# Annex 3: Approved copper preparations in viticulture farming (EU and Austria)

For organic viticulture farming, the maximum copper application rate in the EU is limited to 28 kg per hectare of copper over a period of 7 years (an average of 4 kg per hectare and per year) (European Commission 2018). For Austria, the limit is 3 kg per ha and year. The following copper preparations are permitted for organic viticulture farming (Bio Austria 2024):

- Copper hydroxid
- Copper oxylchlorid
- Copper oxid
- Copper lime solution
- Copper sulfate tetrahydrate

# References

Bio Austria (2024) Richtlinien für die Produktion. Available at [www.bio-austria.at](http://www.bio-austria.at). Accessed 10 October 2024

Council of the European Union (2013) Regulation (EU) 1308/2013 of the European Parliament and of the Council of 17 December 2013 establishing a common organization of the markets in agriculture products and repealing Council Regulations (EEC) No 922/72, (EEC) No 234/79, (EC) No 1037/2001 and (EC) No 1234/2007. Official Journal of the European Union, L 347:671-854. <https://eur-lex.europa.eu/legal-content/EN/TXT/?uri=CELEX%3A32013R1308>. Accessed 15 October 2024.

European Commission (2018) Commission Implementing Regulation (EU) 2018/1981 of 13 December 2018 renewing the approval of the active substances copper compounds, as candidates for substitution, in accordance with Regulation (EC) No 1107/2009 of the European Parliament and of the Council concerning the placing of plant protection products on the market, and amending the Annex to Commission Implementing Regulation (EU) No 540/201. Official Journal of the European Union, L317:16-20. <http://data.europa.eu/eli/reg_impl/2018/1981/oj>. Accessed 23 Sept 2025.

Karlik L, Marián G, Falťan V, Havlíček M (2018) Vineyard zonation based on natural terroir factors using multivariate statistics – Case study Burgenland (Austria). OENO ONE 52(2). <https://doi.org/10.20870/oeno-one.2018.52.2.1907>

Österreichischer Weinbauverband (2019) „Nachhaltig Austria“ nachhaltig zukunftsfit. Das neue Gütesiegel für nachhaltigen Weinbau. Vienna, Austria. <https://www.nachhaltigaustria.at/wp-content/uploads/2019/10/Nachhaltigkeits_Folder_Winzer.pdf>. Accessed 20 March 2025.

Österreich Wein Marketing GmbH (2024) Weinkategorien nach Herkunft. Österreich Wein, Wien Österreich. <https://www.oesterreichwein.at/unser-wein/das-weingesetz/weinkategorien-nach-herkunft>. Accessed 20 October 2024.

Österreich Wein Marketing GmbH (2025) Dokumentation Österreich Wein. Stand 02. Mai. 2025. Österreich Wein. Wien, Österreich. <https://www.oesterreichwein.at/fileadmin/user_upload/PDF/Doku/Dokumentation_OEsterreich_Wein_Gesamtdokument.pdf>. Accessed 08 July 2025.

RIS (2023): Gesamte Rechtsvorschrift für Weingesetz 2009, Fassung vom 22.07.2023. <http://www.bundeskellereiinspektion.at/downloads/allgemein/weingesetz2009.pdf>. Accessed 20 October 2024.

Statistik Austria (2024) Weinernte und Weinbestand. Kalenderjahr 2023. Endgültige Ergebnisse. [https://www.statistik.at/fileadmin/user_upload/SB_1-15-WeinernteUndBestand2023.pdf. Accessed 03 March 2024](https://www.statistik.at/fileadmin/user_upload/SB_1-15-WeinernteUndBestand2023.pdf.%20Accessed%2003%20March%202024).

Tomšík P, Prokeš M (2011) New strategic alliances of wine producers in the Czech Republic. Agricultural Economics 57(12):573-579. <https://doi.org/10.17221/183/2011-AGRICECON>.
